# Supplementary material
Source: publisher site journal article supplement (https://www.dovepress.com/article/552741)
Supplement: Supplementary file 1 [file 552741_Supplementary_Material.docx]

Supplementary Material


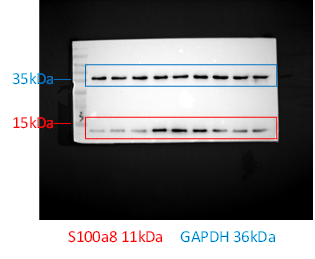

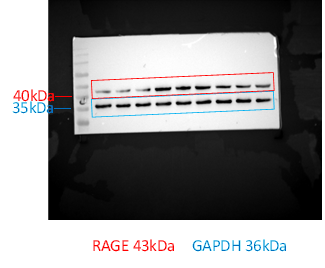


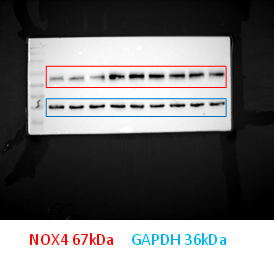

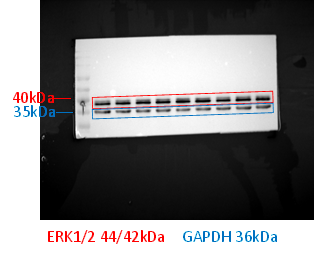


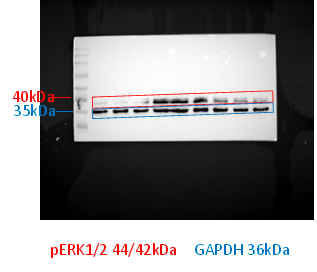

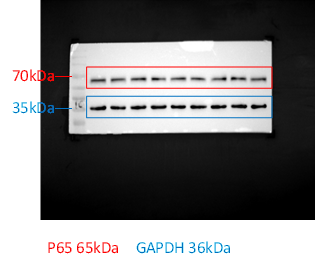


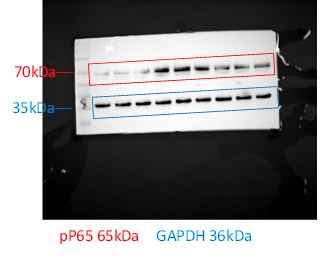

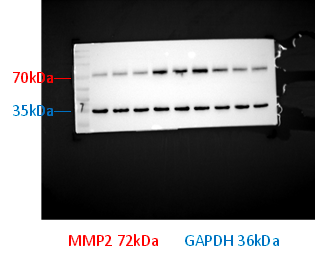


**Supplementary Figure 1.** Full uncropped Blots image(s) of figure 5 are presented.

**
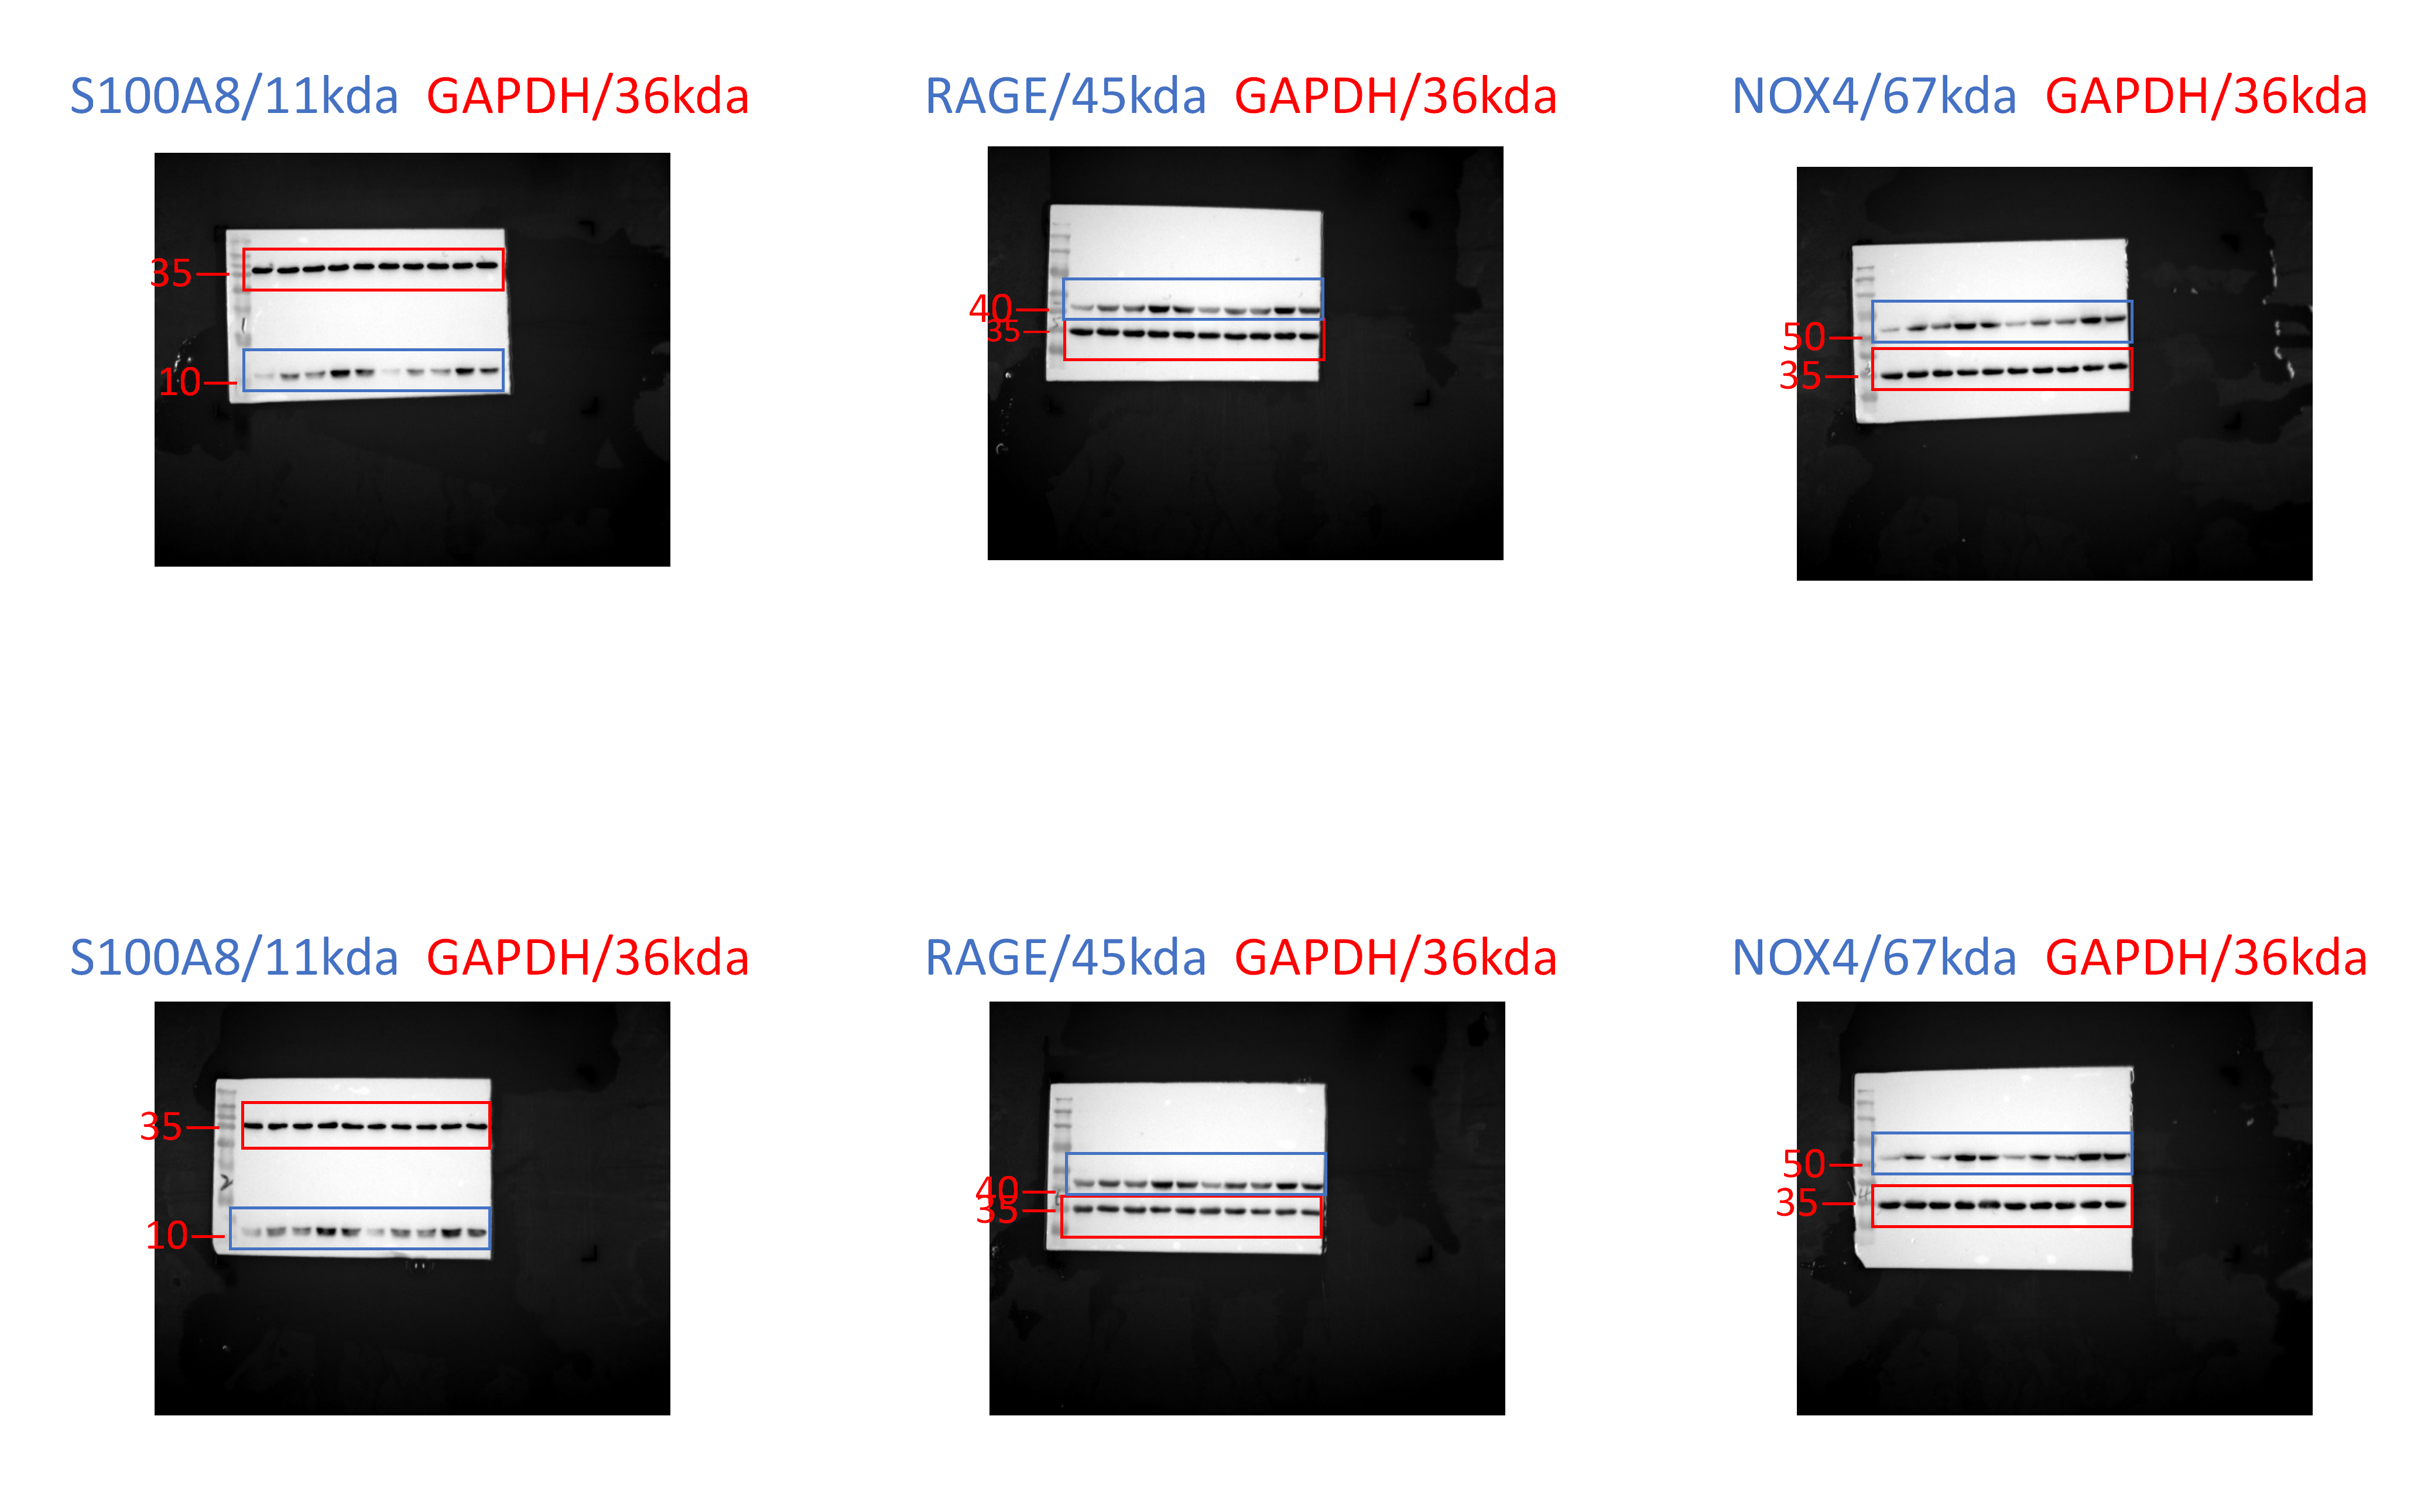
**

**Supplementary Figure 2.** Full uncropped Blots image(s) of figure 7 are presented.
